# Supplementary material for: Artificial Intelligence-Enabled Electrocardiography Predicts Left Ventricular Dysfunction and Future Cardiovascular Outcomes: A Retrospective Analysis
Source: MDPI journal article supplement (doi:10.3390/jpm12030455), 2022-03-13
Supplement: s1 [file s1]

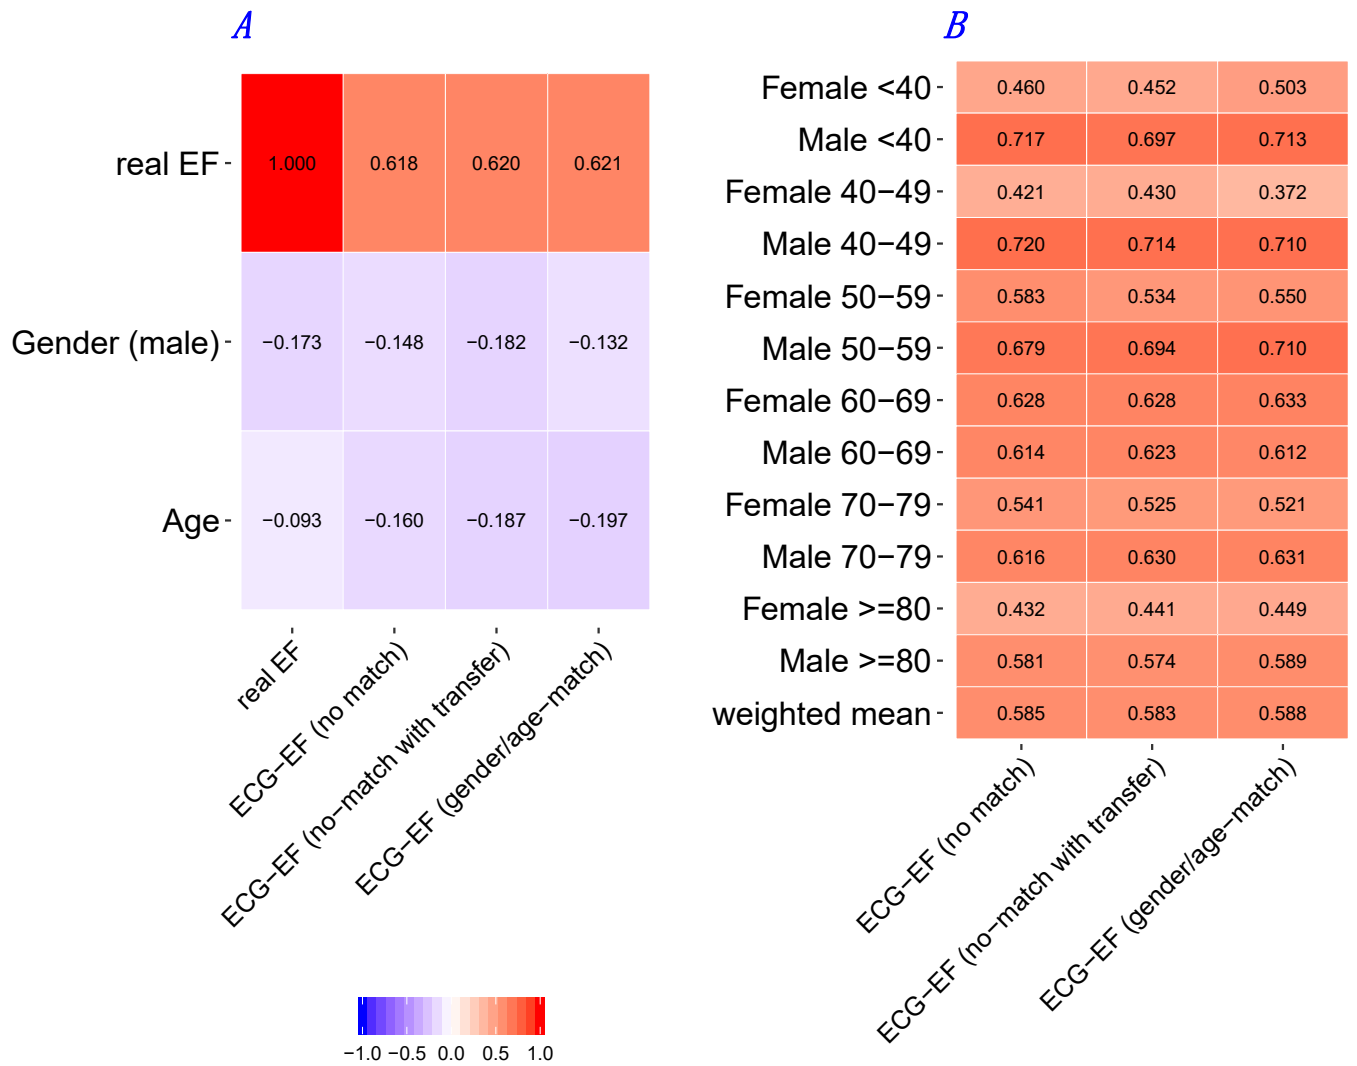

**Supplementary Figure S1 | Performance comparison of DLMs trained by 3 different training strategies in validation cohort.** The ECG-EF (...) were made by the predictions of DLMs using different strategies. The heatmaps were colored according to the values of correlation. The gender/age-matching strategy provides the highest crude correlation between estimated EF and real EF (left panel, A). The values in stratified analysis (right panel, B) were the correlations between estimated EF and real EF in each subgroup, which also shows the better weighted mean of correlations (weighting by number of samples) in gender/age-matching strategy.

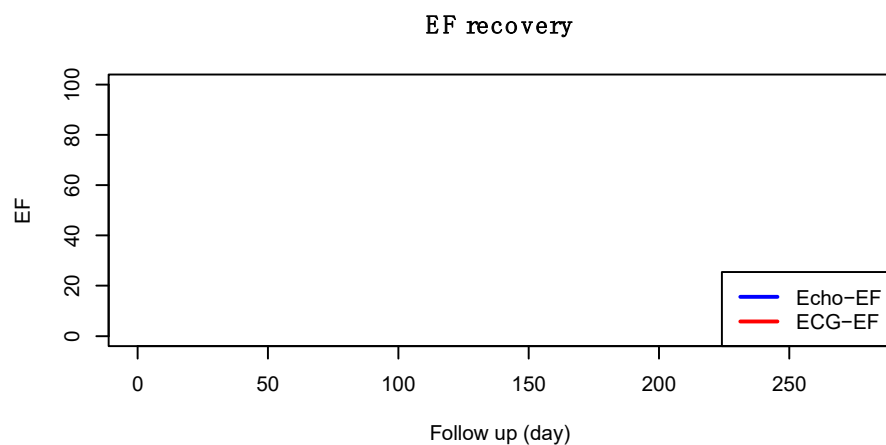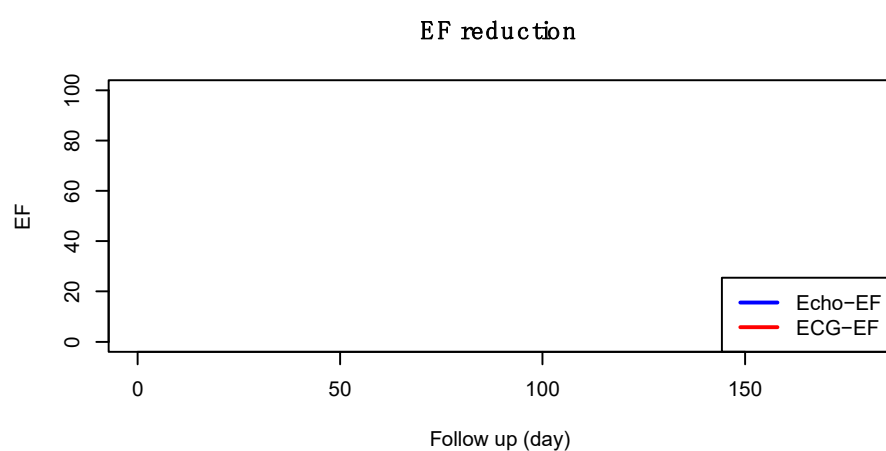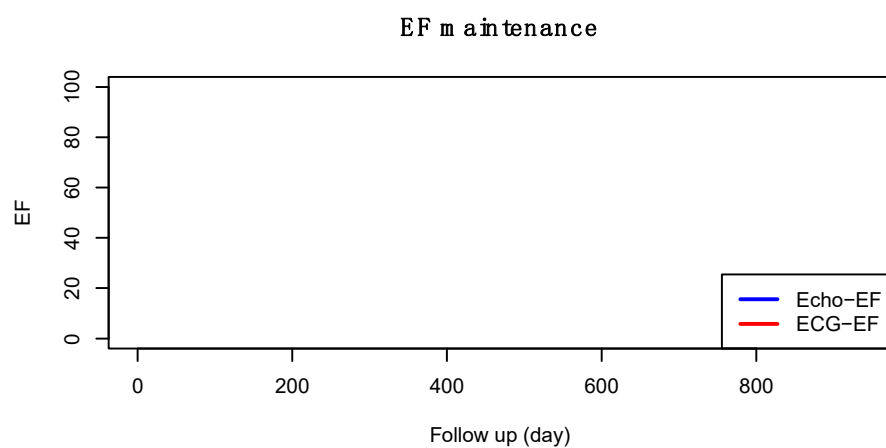

**Supplementary Figure S2 | The selected cases with more than 3 ECHO-EFs and ECG-EFs. The trend lines were based on the linear regression**

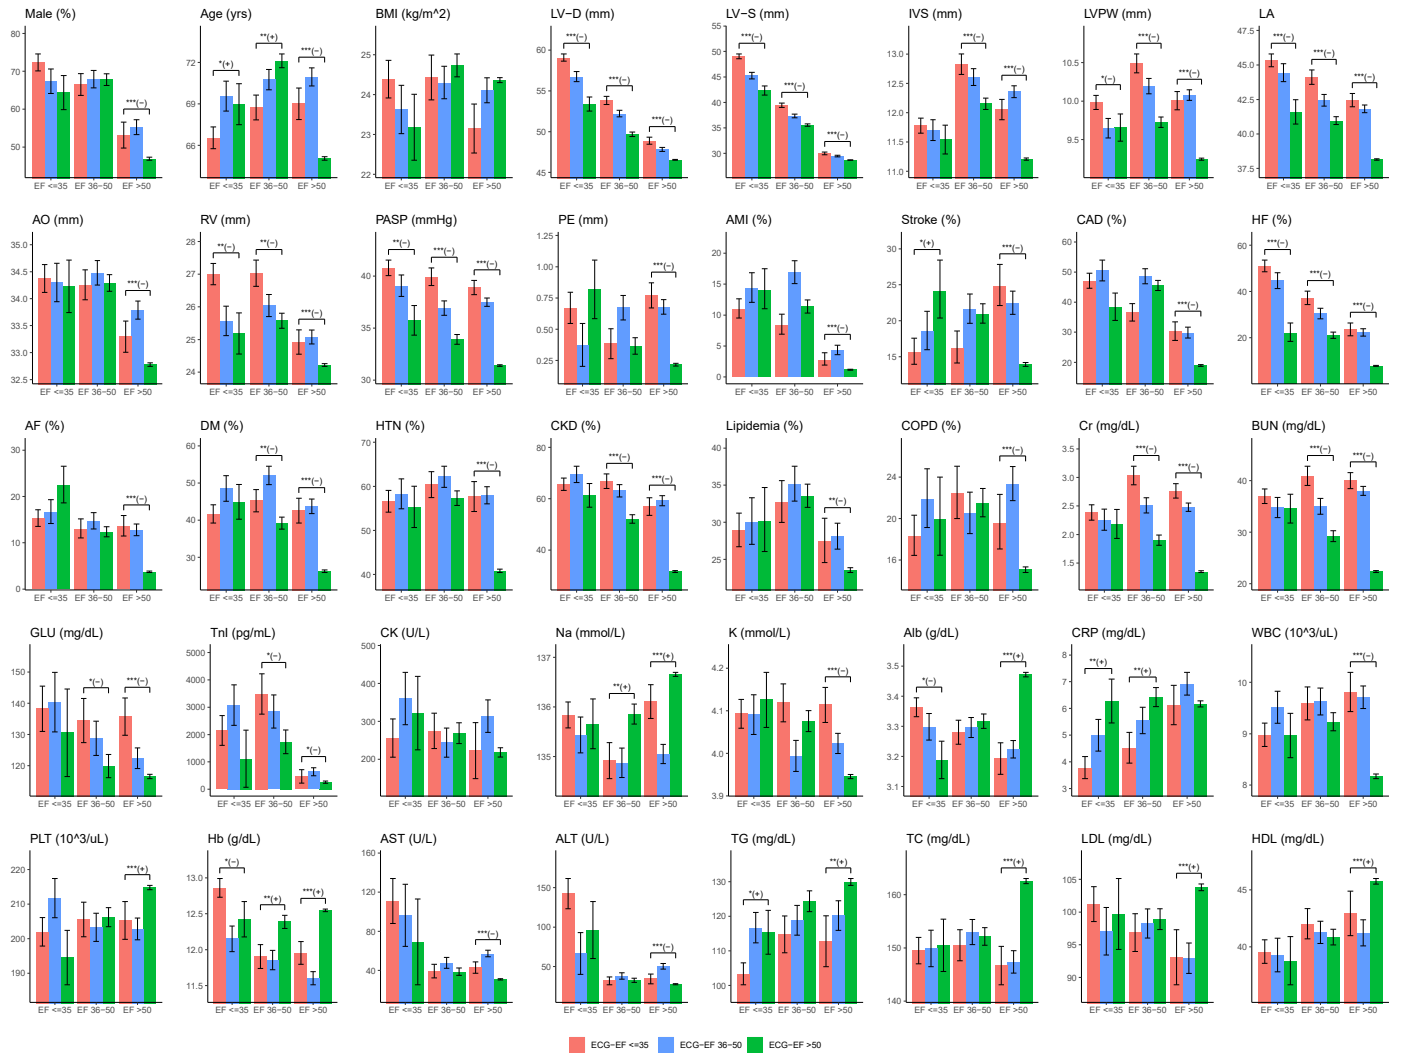

**Supplementary Figure S3 | The patient characteristics in different ECG-EF groups and real EF groups.**

The bars represent the mean or proportion where appropriate and corresponding 95% confidence intervals, which are adjusted by real EF in each EF group via linear or logistic regression. The significant tests are based on the trend test (\*: p for trend < 0.05; \*\*: p for trend < 0.01; \*\*\*: p for trend < 0.001), and the sign represents the correlation direction.

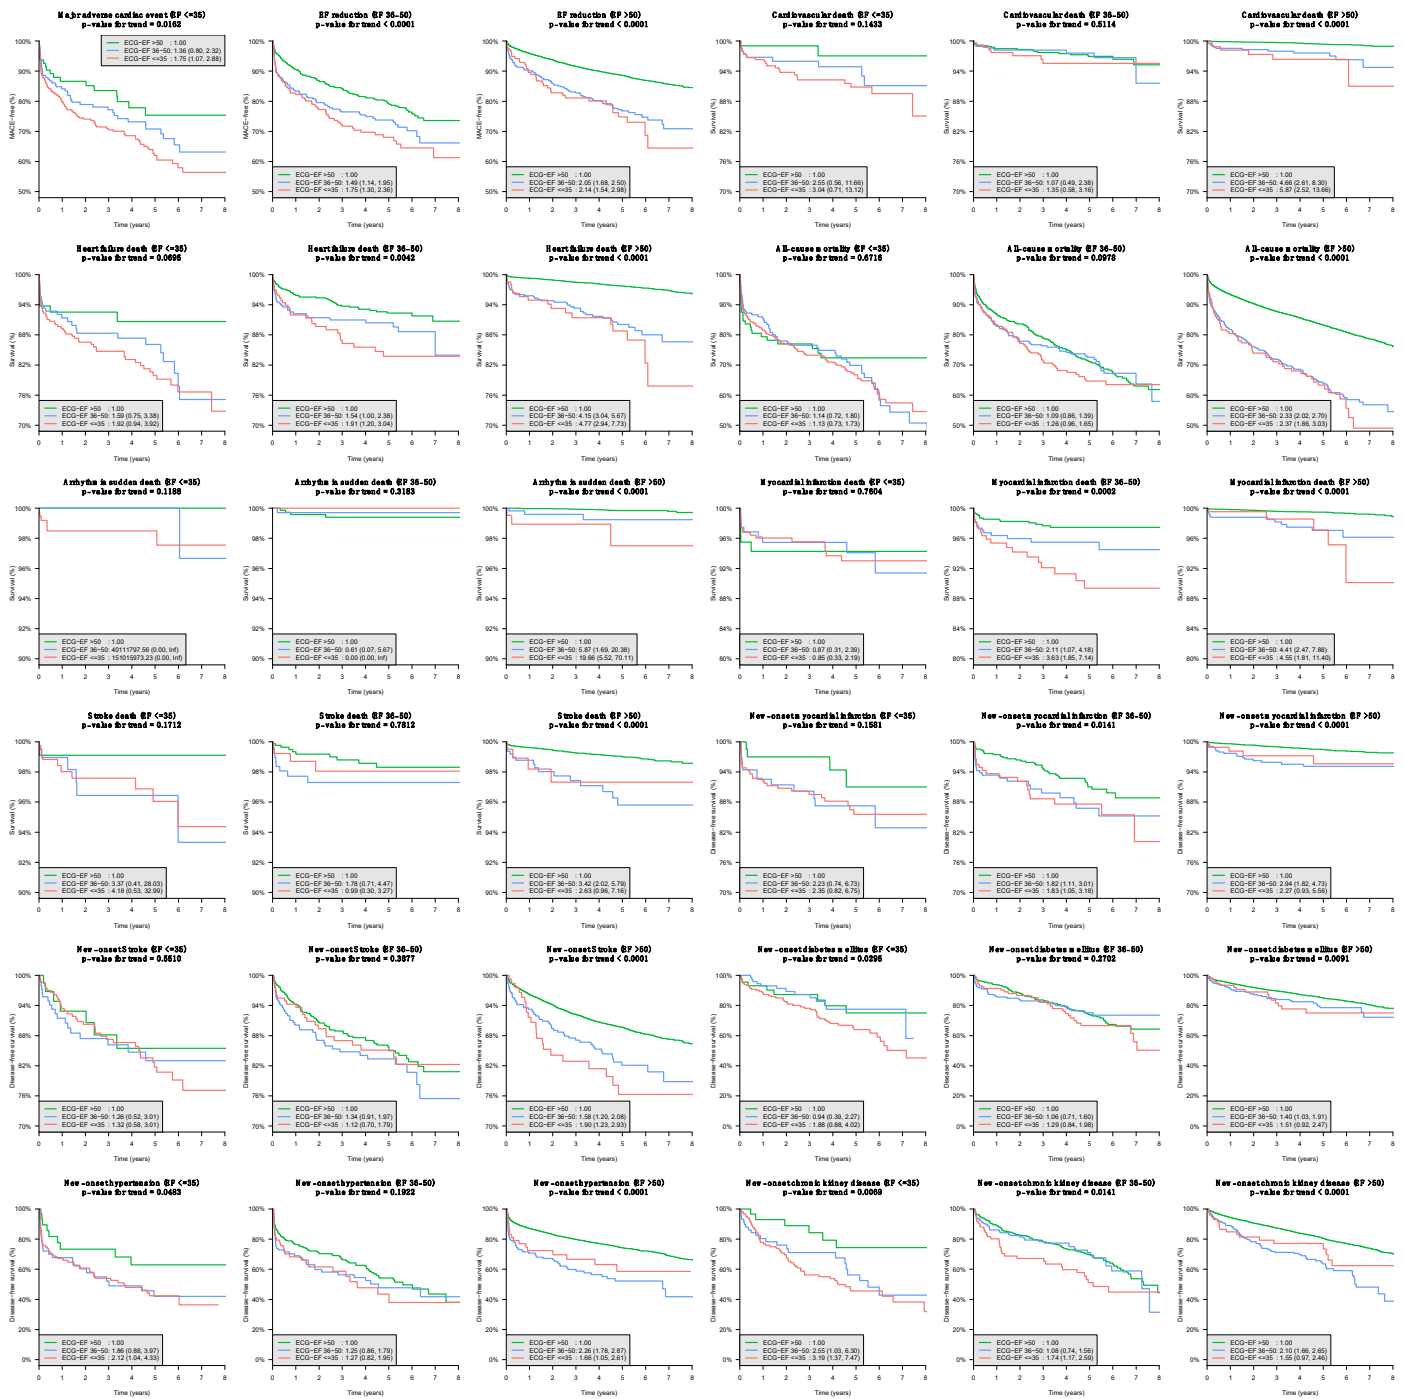

**Supplementary Figure S4 | The comparison between each ECG-EF group on secondary outcomes. All analyses were based on Cox proportional hazard model adjusting the ECHO-EF.**



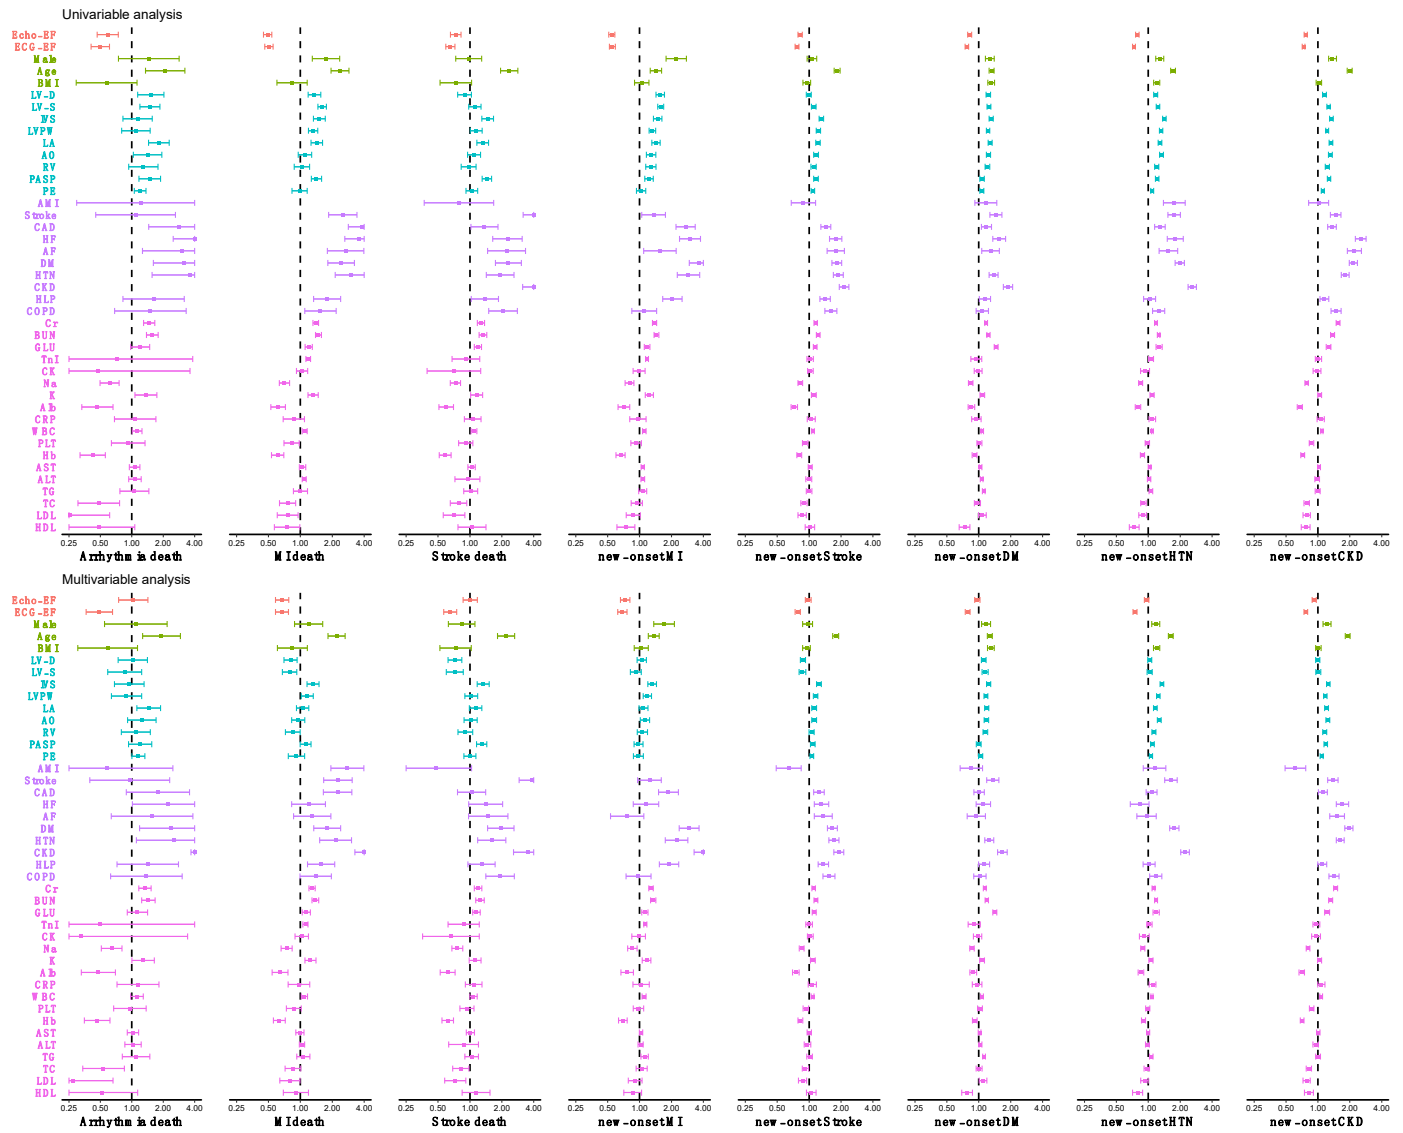

**Supplementary Figure S6 | Risk effect analysis of patient characteristics on secondary outcomes.** The univariable and multivariable analysis are conducted by Cox proportional hazard model, and the adjusted variables include ECHO-EF and ECG-EF. The continuous variables are standardized by mean and standard deviation, so the units of each continuous variable were 1 standard deviation.

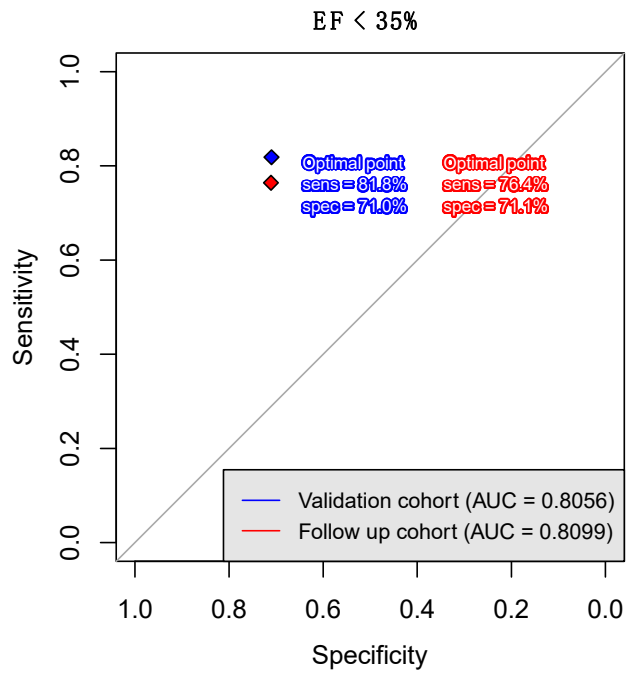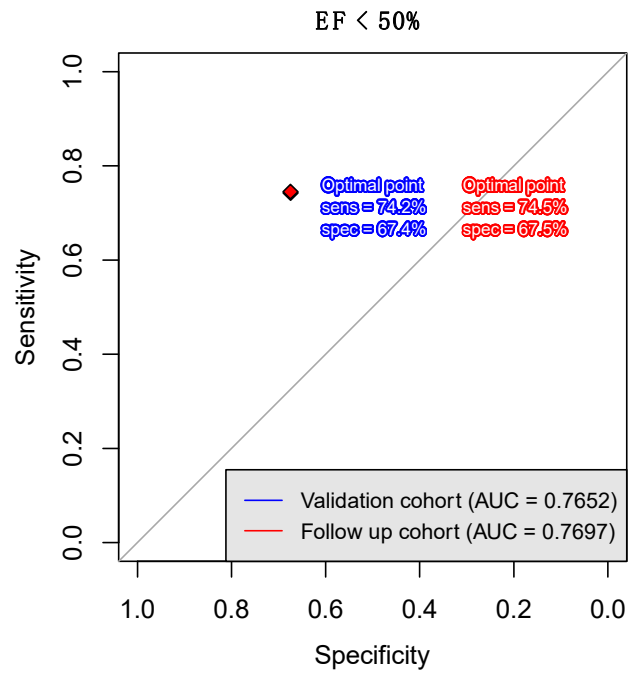

**Supplement Figure S7 | The performance for detection of decreased EF using BNP in validation and follow-up cohorts.** ROC curves demonstrate two cut-off points ( $EF \leq 35\%$  and  $EF \leq 50\%$ ) to calculate the sensitivities and specificities. The optimal point was based on the maximum of Yuden index in validation cohort.

Supplementary Table S1 | Corresponding patient characteristics and laboratory results of AD and non-AD records in the ECG dataset

|                       | Development cohort |             |         | Validation cohort |             |         | Follow-up cohort |             |         | P value† |
|-----------------------|--------------------|-------------|---------|-------------------|-------------|---------|------------------|-------------|---------|----------|
|                       | EF > 35            | EF ≤ 35     | P value | EF > 35           | EF ≤ 35     | P value | EF > 35          | EF ≤ 35     | P value |          |
|                       | (n = 53,428)       | (n = 3778)  |         | (n = 10,206)      | (n = 556)   |         | (n = 19,889)     | (n = 740)   |         |          |
| Demographic data      |                    |             |         |                   |             |         |                  |             |         |          |
| OPD/HC                | 7719(14.4%)        | 143(3.8%)   | <0.001  | 1617(15.8%)       | 22(4.0%)    | <0.001  | 3191(16.0%)      | 60(8.1%)    | <0.001  | <0.001   |
| Sex (male)            | 28908(54.1%)       | 2892(76.5%) | <0.001  | 5448(53.4%)       | 398(71.6%)  | <0.001  | 9743(49.0%)      | 516(69.7%)  | <0.001  | <0.001   |
| Age (years)           | 66.6 ± 16.8        | 67.2 ± 14.9 | 0.015   | 65.9 ± 17.6       | 66.6 ± 16.5 | 0.329   | 65.8 ± 16.8      | 67.8 ± 15.9 | 0.001   | <0.001   |
| BMI (kg/m²)           | 24.8 ± 6.1         | 24.6 ± 7.1  | 0.101   | 24.7 ± 7.6        | 24.9 ± 4.9  | 0.700   | 25.0 ± 34.8      | 24.3 ± 5.1  | 0.798   | 0.502    |
| Smoking               | 371(35.5%)         | 32(65.3%)   | <0.001  | 67(37.9%)         | 0(0.0%)     | 0.529   | 109(37.6%)       | 1(33.3%)    | 1.000   | 0.966    |
| SBP (mm Hg)           | 140.7±31.1         | 134.6±29.3  | <0.001  | 134.4±26.8        | 151.7±5.8   | 0.178   | 133.3±27.6       | 115.7±21.4  | 0.213   | 0.168    |
| DBP (mm Hg)           | 78.7±20.2          | 83.6±21.6   | <0.001  | 77.5±17.3         | 102.3±9.8   | 0.023   | 80.4±18.7        | 80.7±21.4   | 0.807   | 0.908    |
| Echocardiography data |                    |             |         |                   |             |         |                  |             |         |          |
| EF (%)                | 64.3 ± 10.1        | 26.4 ± 6.3  | <0.001  | 65.4 ± 10.0       | 25.7 ± 6.5  | <0.001  | 66.0 ± 9.1       | 26.1 ± 6.2  | <0.001  | <0.001   |
| LV-D (mm)             | 47.2±6.9           | 57.0±8.8    | <0.001  | 46.8±6.9          | 58.3±9.5    | <0.001  | 47.0±6.6         | 57.6±9.2    | <0.001  | <0.001   |
| LV-S (mm)             | 29.8±5.8           | 46.3±9.9    | <0.001  | 29.4±5.8          | 47.9±10.4   | <0.001  | 29.3±5.5         | 47.0±10.2   | <0.001  | <0.001   |
| IVS (mm)              | 11.4±2.7           | 11.3±2.6    | 0.053   | 11.3±2.5          | 11.4±2.6    | 0.741   | 11.3±2.6         | 11.7±2.6    | <0.001  | 0.015    |
| LVPW (mm)             | 9.4±1.7            | 9.7±1.7     | <0.001  | 9.3±1.7           | 9.9±2.2     | <0.001  | 9.3±1.8          | 9.8±1.8     | <0.001  | 0.062    |
| LA (mm)               | 38.7±7.5           | 42.6±8.3    | <0.001  | 38.6±7.6          | 44.8±9.0    | <0.001  | 38.6±7.3         | 44.5±9.4    | <0.001  | 0.138    |
| AO (mm)               | 33.0±4.3           | 34.0±4.6    | <0.001  | 32.9±4.3          | 33.6±4.5    | <0.001  | 32.9±4.3         | 34.3±5.1    | <0.001  | 0.001    |
| RV (mm)               | 23.5±4.8           | 24.6±5.7    | <0.001  | 24.6±5.2          | 26.2±5.9    | <0.001  | 24.3±5.3         | 26.4±6.1    | <0.001  | <0.001   |
| PASP (mm Hg)          | 33.9±11.5          | 38.9±14.6   | <0.001  | 33.0±11.2         | 40.5±15.6   | <0.001  | 32.0±10.5        | 39.5±15.1   | <0.001  | <0.001   |
| Disease history       |                    |             |         |                   |             |         |                  |             |         |          |
| AMI                   | 5283(9.9%)         | 1052(27.8%) | <0.001  | 735(7.2%)         | 108(19.4%)  | <0.001  | 722(3.6%)        | 128(17.3%)  | <0.001  | <0.001   |
| Stroke                | 9705(18.2%)        | 691(18.3%)  | 0.847   | 1996(19.6%)       | 109(19.6%)  | 0.978   | 3253(16.4%)      | 148(20.0%)  | 0.009   | <0.001   |
| CAD                   | 17339(32.5%)       | 2313(61.2%) | <0.001  | 3198(31.3%)       | 321(57.7%)  | <0.001  | 5100(25.6%)      | 445(60.1%)  | <0.001  | <0.001   |
| HF                    | 6203(11.6%)        | 2005(53.1%) | <0.001  | 1269(12.4%)       | 328(59.0%)  | <0.001  | 2450(12.3%)      | 453(61.2%)  | <0.001  | 0.184    |
| AF                    | 5165(9.7%)         | 687(18.2%)  | <0.001  | 934(9.2%)         | 101(18.2%)  | <0.001  | 1288(6.5%)       | 161(21.8%)  | <0.001  | <0.001   |
| DM                    | 19671(36.8%)       | 1821(48.2%) | <0.001  | 3441(33.7%)       | 235(42.3%)  | <0.001  | 6063(30.5%)      | 349(47.2%)  | <0.001  | <0.001   |
| HTN                   | 25657(48.0%)       | 2078(55.0%) | <0.001  | 5040(49.4%)       | 332(59.7%)  | <0.001  | 9795(49.2%)      | 494(66.8%)  | <0.001  | <0.001   |
| CKD                   | 24139(45.2%)       | 2779(73.6%) | <0.001  | 4243(41.6%)       | 391(70.3%)  | <0.001  | 7126(35.8%)      | 506(68.4%)  | <0.001  | <0.001   |
| HLP                   | 16966(31.8%)       | 1268(33.6%) | 0.021   | 2866(28.1%)       | 158(28.4%)  | 0.864   | 4899(24.6%)      | 218(29.5%)  | 0.003   | <0.001   |
| COPD                  | 7824(14.6%)        | 615(16.3%)  | 0.006   | 1748(17.1%)       | 103(18.5%)  | 0.395   | 3180(16.0%)      | 145(19.6%)  | 0.009   | <0.001   |
| Laboratory test       |                    |             |         |                   |             |         |                  |             |         |          |
| eGFR (mL/min/1.73m²)  | 73.1±40.1          | 55.0±37.0   | <0.001  | 73.0±39.2         | 56.8±32.9   | <0.001  | 76.8±37.4        | 54.5±32.0   | <0.001  | <0.001   |
| Cr (mg/dL)            | 1.6±2.1            | 2.3±2.3     | <0.001  | 1.6±2.2           | 2.0±1.9     | <0.001  | 1.5±2.0          | 2.3±2.7     | <0.001  | <0.001   |
| BUN (mg/dL)           | 28.5±25.4          | 36.9±26.8   | <0.001  | 29.0±27.2         | 36.5±26.2   | <0.001  | 24.1±22.0        | 36.0±26.8   | <0.001  | <0.001   |



|                           | Development cohort |                |            | Validation cohort |                |            | Follow-up cohort |               |            | P<br>value† |
|---------------------------|--------------------|----------------|------------|-------------------|----------------|------------|------------------|---------------|------------|-------------|
|                           | EF > 35            | EF ≤ 35        | P<br>value | EF > 35           | EF ≤ 35        | P<br>value | EF > 35          | EF ≤ 35       | P<br>value |             |
|                           | (n = 53,428)       | (n = 3778)     |            | (n = 10,206)      | (n = 556)      |            | (n = 19,889)     | (n = 740)     |            |             |
| GLU (gm/dL)               | 120.4±50.7         | 126.6±52.9     | <0.001     | 116.5±45.6        | 116.6±41.4     | 0.978      | 117.7±52.6       | 137.6±80.9    | <0.001     | <0.001      |
| TnI (pg/mL)               | 1723.1±8027.8      | 5692.2±16590.8 | <0.001     | 1113.9±6900.0     | 3033.9±12212.5 | <0.001     | 640.3±5201.6     | 2271.9±9613.8 | <0.001     | <0.001      |
| CK (U/L)                  | 328.6±1189.2       | 559.8±1619.1   | <0.001     | 305.4±1122.2      | 276.9±960.4    | 0.575      | 232.6±894.8      | 296.2±890.2   | 0.098      | <0.001      |
| Na <sup>+</sup> (mmol/L)  | 137.2±5.3          | 137.5±5.6      | 0.002      | 136.5±5.5         | 136.2±5.2      | 0.344      | 136.5±5.0        | 135.7±5.2     | <0.001     | <0.001      |
| K <sup>+</sup> (mmol/L)   | 4.0±0.6            | 4.1±0.7        | <0.001     | 4.0±0.6           | 4.1±0.8        | <0.001     | 4.0±0.6          | 4.1±0.7       | <0.001     | 0.624       |
| Alb (g/dL)                | 3.4±0.6            | 3.3±0.5        | <0.001     | 3.3±0.6           | 3.4±0.5        | 0.050      | 3.4±0.6          | 3.3±0.6       | <0.001     | <0.001      |
| CRP (mg/L)                | 5.6±7.4            | 5.1±6.6        | 0.001      | 6.4±7.8           | 4.8±6.5        | <0.001     | 6.2±7.6          | 4.5±6.1       | <0.001     | <0.001      |
| WBC (10 <sup>3</sup> /μL) | 9.4±7.3            | 10.4±6.2       | <0.001     | 9.5±7.3           | 9.9±6.4        | 0.270      | 8.4±5.5          | 9.1±4.4       | <0.001     | <0.001      |
| PLT (10 <sup>3</sup> /μL) | 225.9±92.0         | 209.5±90.9     | <0.001     | 213.1±85.8        | 205.4±78.2     | 0.039      | 213.4±79.2       | 203.7±80.7    | 0.001      | <0.001      |
| Hb (g/dL)                 | 12.3±2.5           | 12.2±2.7       | 0.013      | 12.5±2.5          | 13.0±2.8       | <0.001     | 12.5±2.3         | 12.6±2.6      | 0.203      | <0.001      |
| AST (U/L)                 | 45.6±158.7         | 136.6±374.5    | <0.001     | 48.4±190.7        | 70.4±181.0     | 0.008      | 32.8±87.1        | 100.4±451.6   | <0.001     | <0.001      |
| ALT (U/L)                 | 36.2±126.3         | 108.6±352.5    | <0.001     | 41.0±182.0        | 111.1±379.6    | <0.001     | 29.0±85.8        | 112.6±366.1   | <0.001     | <0.001      |
| TG (g/dl)                 | 130.4±105.0        | 114.8±71.5     | <0.001     | 126.2±107.5       | 98.7±54.0      | <0.001     | 128.4±97.2       | 109.0±60.5    | <0.001     | <0.001      |
| TC (g/dl)                 | 156.5±48.5         | 140.9±47.8     | <0.001     | 155.3±47.9        | 147.6±42.2     | <0.001     | 160.4±47.9       | 149.8±46.2    | <0.001     | <0.001      |
| LDL (g/dl)                | 92.4±38.1          | 85.2±37.5      | <0.001     | 98.4±36.6         | 96.5±36.1      | 0.336      | 102.5±38.1       | 99.8±39.6     | 0.167      | <0.001      |
| HDL (g/dl)                | 41.8±15.0          | 36.8±13.3      | <0.001     | 43.4±13.5         | 36.6±12.3      | <0.001     | 45.0±14.3        | 39.4±12.8     | <0.001     | <0.001      |
| BNP (pg/mL)               | 555.6±900.8        | 1735.0±1488.4  | <0.001     | 579.4±911.1       | 1742.0±1555.0  | <0.001     | 564.1±872.1      | 1655.1±1409.9 | <0.001     | 0.958       |

†: hypothesis test of the differences among the development cohort, validation cohort, and follow-up cohort; Abbreviations: EF, ejection fraction; OPD/HC, outpatient department/health center; BMI, body mass index; SBP, systolic blood pressure; DBP, diastolic blood pressure; LV-D, left ventricle (end-diastole); LV-S, left ventricle (end-systole); IVS, Interventricular septum; LVPW, left ventricular posterior wall; LA, left atrium; AO, aortic root; RV, right ventricle; PASP, pulmonary artery systolic pressure; PE, pericardial effusion; AMI, acute myocardial infarction; CAD, coronary artery disease; HF, heart failure; AF, atrial fibrillation; DM, diabetes mellitus; HTN, hypertension; CKD, chronic kidney disease; HLP, hyperlipidemia; COPD, chronic obstructive pulmonary disease; Cr, creatinine; BUN, blood urea nitrogen; GLU, fasting glucose; TnI, troponin I; CK, creatine kinase; Na<sup>+</sup>, sodium; K<sup>+</sup>, potassium; Alb, albumin; CRP, C-reactive protein; WBC, white blood cell count; Hb: hemoglobin; AST, aspartate aminotransferase; ALT, alanine aminotransferase; TG, triglyceride; TC, total cholesterol; LDL, low density lipoprotein cholesterol; HDL, high density lipoprotein cholesterol; BNP, brain natriuretic peptide.
